# Supplementary material
Source: Springer Nature journal article supplement (https://www.springermedizin.de/resource/supplementary/12933_2012_454_MOESM3_ESM.pdf/9538552)

Myocardial Infarct Size  
(% of Area at Risk)

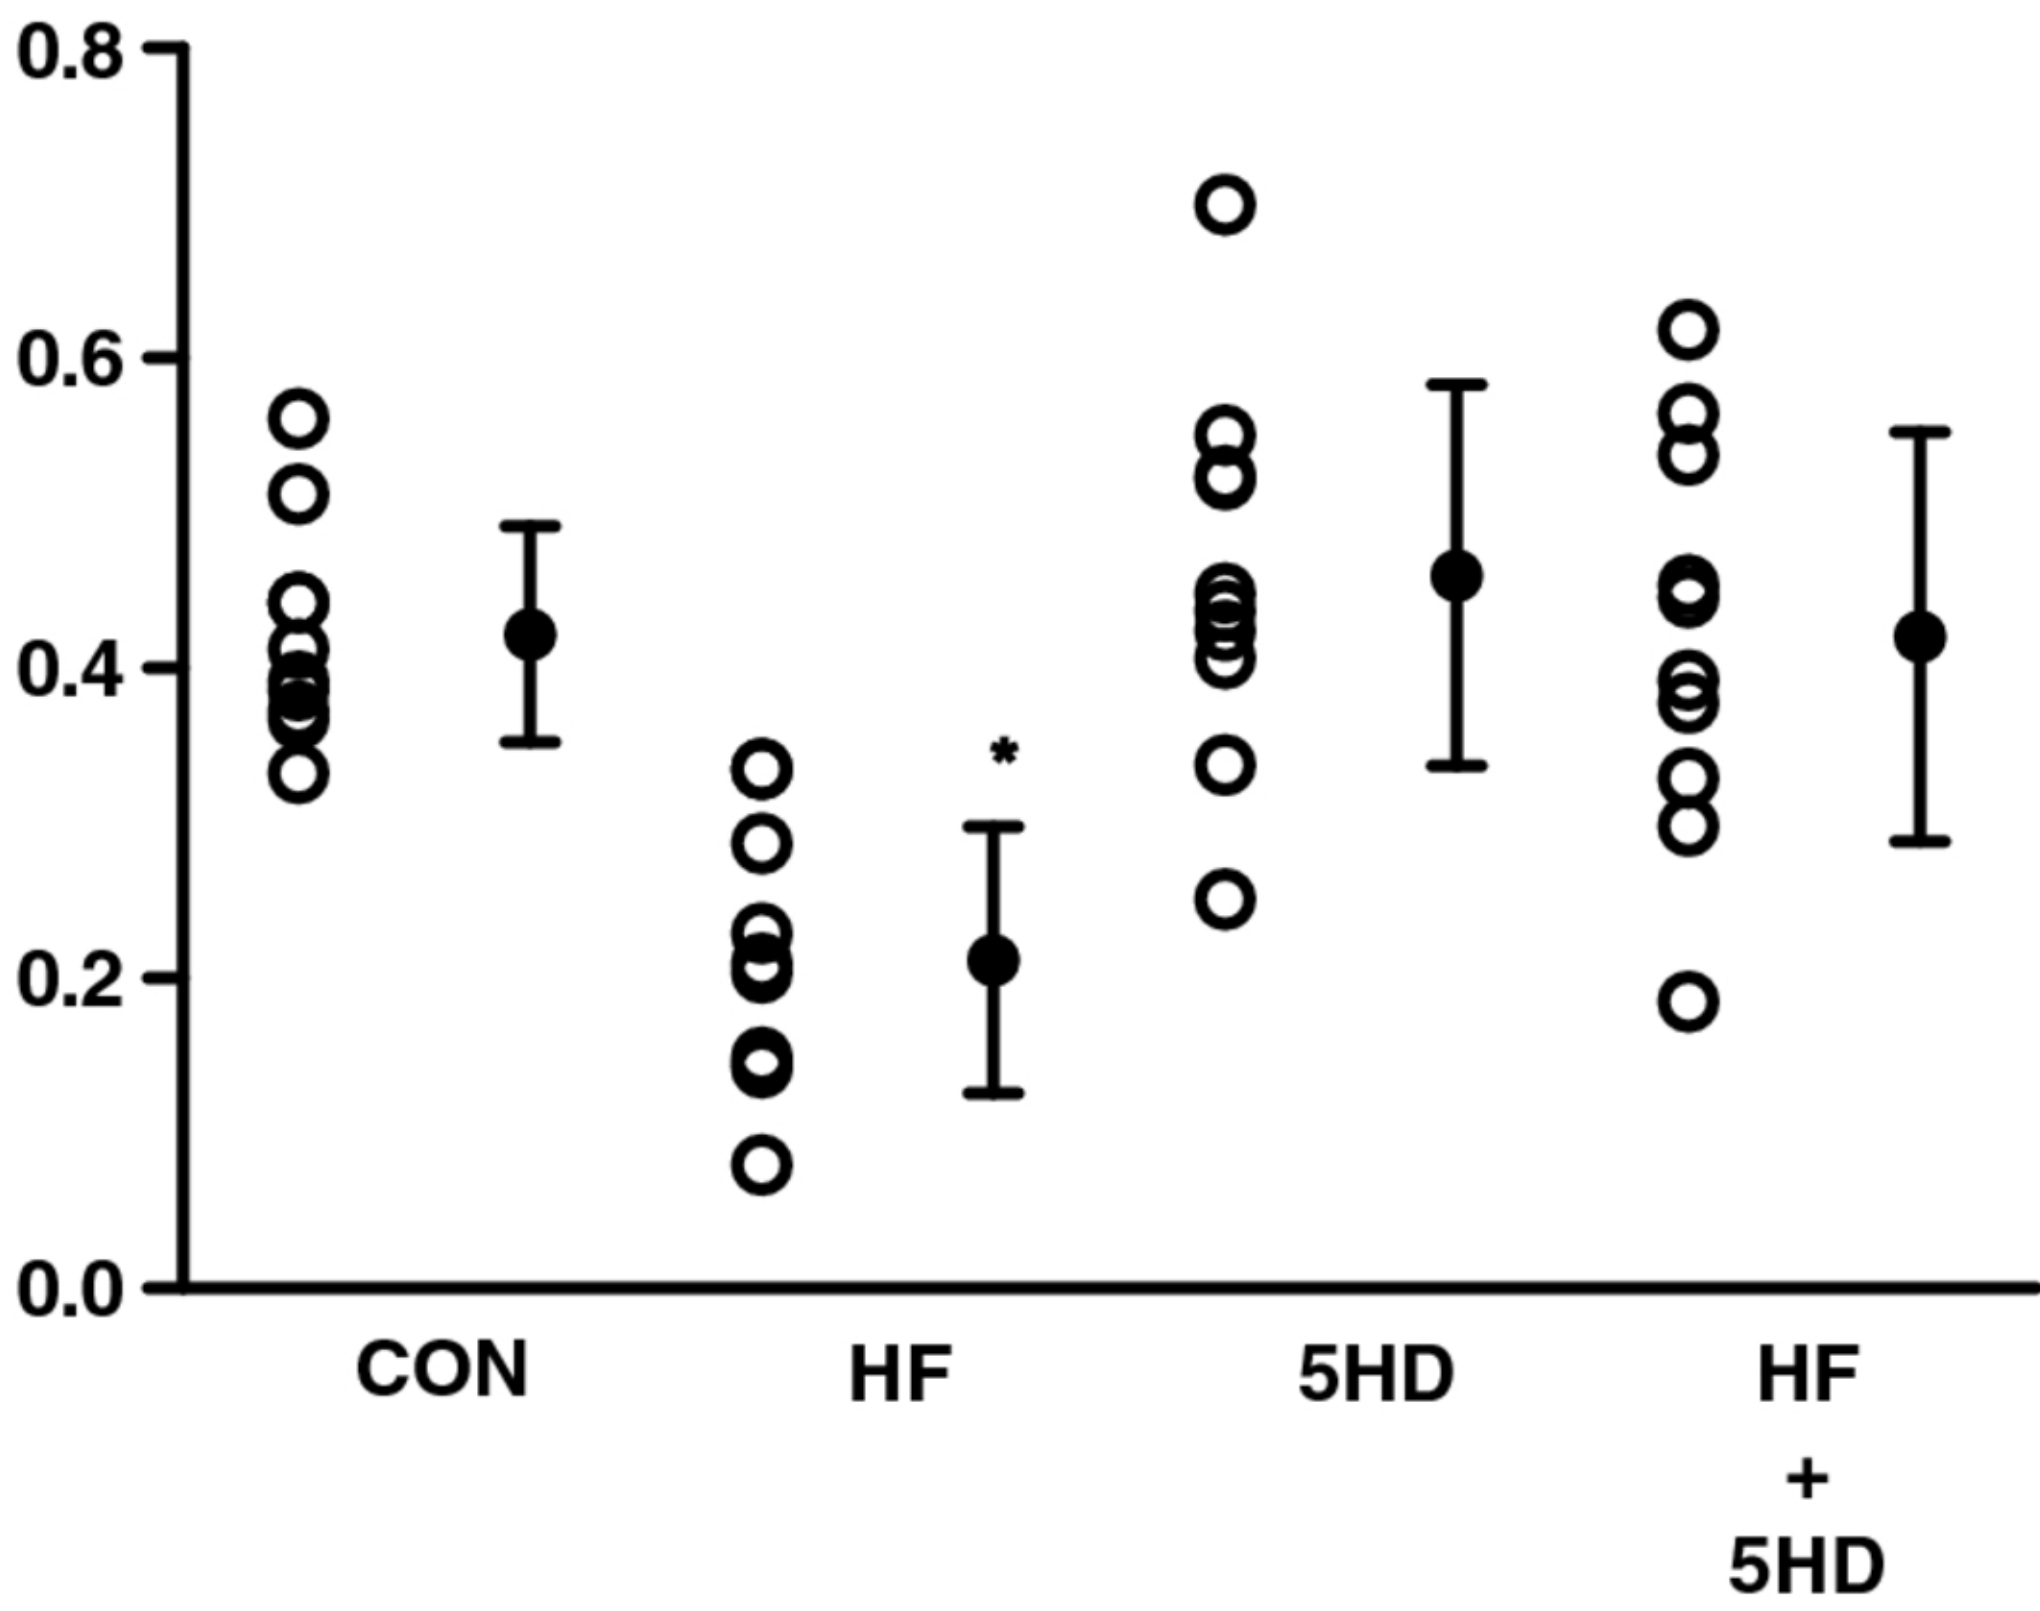

Supplement: MOESM3 [file 9538552]
